# Supplementary material for: Symptom profiles and their risk factors in patients with post-COVID-19 condition: a Dutch longitudinal cohort study
Source: PubMed Central journal article supplement (PMC10710342; doi:10.1093/eurpub/ckad152), 2023-08-22
Supplement: ckad152_supplementary_data.pdf [file ckad152_supplementary_data.pdf]

**Supplement table 1.** Comparison of characteristics between included and excluded individuals

| Characteristic                  | Included participants<br>N=3,465 |      | Excluded by specific reason     |      |                                |      |                                                            |      |                                                                   |      |                                  |       |                                                         |      | Excluded total<br>N=8,450 |      |
|---------------------------------|----------------------------------|------|---------------------------------|------|--------------------------------|------|------------------------------------------------------------|------|-------------------------------------------------------------------|------|----------------------------------|-------|---------------------------------------------------------|------|---------------------------|------|
|                                 | n                                | %    | Positive on first wave<br>N=386 |      | Positive on last wave<br>N=756 |      | No measurement 7 days before SARS-CoV-2 infection<br>N=405 |      | No measurement 90-150 days after SARS-CoV-2 infection*<br>N=4,067 |      | Incomplete symptom data<br>N=110 |       | Drop-out after wave of SARS-CoV-2 infection<br>N= 2,726 |      | n                         | %    |
| Age                             |                                  |      | n                               | %    | n                              | %    | n                                                          | %    | n                                                                 | %    | n                                | %     | n                                                       | %    | n                         | %    |
| 18-39                           | 343                              | 9.9  | 89                              | 23.1 | 69                             | 9.1  | 84                                                         | 20.7 | 404                                                               | 9.9  | 10                               | 9.1   | 389                                                     | 14.3 | 1,045                     | 12.4 |
| 40-59                           | 1,810                            | 52.2 | 213                             | 55.2 | 404                            | 53.4 | 248                                                        | 61.2 | 2,103                                                             | 51.7 | 62                               | 56.4  | 1,521                                                   | 55.8 | 4,551                     | 53.9 |
| ≥60                             | 1,312                            | 37.9 | 84                              | 21.8 | 283                            | 37.4 | 73                                                         | 18.0 | 1,560                                                             | 38.4 | 38                               | 34.5  | 816                                                     | 29.9 | 2,854                     | 33.8 |
| Sex                             |                                  |      |                                 |      |                                |      |                                                            |      |                                                                   |      |                                  |       |                                                         |      |                           |      |
| Male                            | 1,238                            | 35.7 | 118                             | 30.6 | 273                            | 36.1 | 138                                                        | 34.1 | 1,502                                                             | 36.9 | 33                               | 30.0  | 909                                                     | 33.3 | 2,973                     | 35.2 |
| Female                          | 2,227                            | 64.3 | 268                             | 69.4 | 483                            | 63.9 | 267                                                        | 65.9 | 2,565                                                             | 63.1 | 77                               | 70.0  | 1,817                                                   | 66.7 | 5,477                     | 64.8 |
| Educational level**             |                                  |      |                                 |      |                                |      |                                                            |      |                                                                   |      |                                  |       |                                                         |      |                           |      |
| High                            | 1,185                            | 34.2 | 148                             | 38.3 | 293                            | 38.8 | 126                                                        | 31.1 | 1,390                                                             | 34.2 | 35                               | 31.8  | 1,027                                                   | 37.7 | 3,019                     | 35.7 |
| Medium                          | 1,380                            | 39.8 | 145                             | 37.6 | 306                            | 40.5 | 162                                                        | 40.0 | 1,605                                                             | 39.5 | 47                               | 42.7  | 1,112                                                   | 40.8 | 3,377                     | 40.0 |
| Low                             | 811                              | 23.4 | 76                              | 19.7 | 144                            | 19.0 | 94                                                         | 23.2 | 946                                                               | 23.3 | >25                              | >22.7 | 489                                                     | 17.9 | 1,775                     | 21.0 |
| Unknown                         | 89                               | 2.6  | 17                              | 4.4  | 13                             | 1.7  | 23                                                         | 5.7  | 126                                                               | 3.1  | <10                              | <9.1  | 98                                                      | 3.6  | 279                       | 3.3  |
| Smoking                         |                                  |      |                                 |      |                                |      |                                                            |      |                                                                   |      |                                  |       |                                                         |      |                           |      |
| No                              | 3,132                            | 90.4 | 339                             | 87.8 | 689                            | 91.1 | 291                                                        | 88.4 | 3,686                                                             | 90.7 | 97                               | 88.2  | 2,422                                                   | 89.5 | 7,524                     | 90.1 |
| Yes                             | 333                              | 9.6  | 47                              | 12.2 | 67                             | 8.9  | 38                                                         | 11.6 | 380                                                               | 9.3  | 13                               | 11.8  | 285                                                     | 10.5 | 830                       | 9.9  |
| Body Mass index                 |                                  |      |                                 |      |                                |      |                                                            |      |                                                                   |      |                                  |       |                                                         |      |                           |      |
| Healthy                         | 1,535                            | 44.3 | 170                             | 45.0 | 380                            | 50.3 | 161                                                        | 42.8 | 1,825                                                             | 44.9 | 59                               | 53.6  | 1,212                                                   | 44.5 | 3,637                     | 45.3 |
| Overweight                      | 1,386                            | 40.0 | 135                             | 35.7 | 261                            | 34.5 | 135                                                        | 35.9 | 1,602                                                             | 39.4 | 37                               | 33.6  | 1,062                                                   | 39.0 | 3,097                     | 38.6 |
| Obese                           | 544                              | 15.7 | 73                              | 19.3 | 115                            | 15.2 | 80                                                         | 21.3 | 638                                                               | 15.7 | 14                               | 12.7  | 451                                                     | 16.6 | 1,298                     | 16.2 |
| Chronic disease                 |                                  |      |                                 |      |                                |      |                                                            |      |                                                                   |      |                                  |       |                                                         |      |                           |      |
| No chronic disease              | 2,469                            | 71.3 | 251                             | 65.0 | 470                            | 69.9 | 143                                                        | 67.5 | 2,645                                                             | 70.9 | 73                               | 67.6  | 1,708                                                   | 72.0 | 5,290                     | 70.7 |
| One chronic disease             | 601                              | 17.3 | 68                              | 17.6 | 131                            | 19.5 | 37                                                         | 17.5 | 661                                                               | 17.7 | 15                               | 13.9  | 396                                                     | 16.7 | 1,308                     | 17.5 |
| Multimorbidity Chronic diseases | 395                              | 11.4 | 67                              | 17.4 | 71                             | 10.6 | 32                                                         | 15.1 | 425                                                               | 11.4 | 20                               | 18.5  | 267                                                     | 11.3 | 882                       | 11.8 |

|                        |       |      |     |      |      |       |      |       |       |      |      |       |       |      |       |      |
|------------------------|-------|------|-----|------|------|-------|------|-------|-------|------|------|-------|-------|------|-------|------|
| Cardiovascular disease | 345   | 10.0 | 42  | 10.9 | 65   | 9.7   | 20   | 9.4   | 376   | 10.1 | 12   | 11.1  | 215   | 9.1  | 730   | 9.8  |
| Lung disease           | 336   | 9.7  | 47  | 12.2 | 45   | 6.7   | 24   | 11.3  | 346   | 9.3  | 14   | 13.0  | 230   | 9.7  | 706   | 9.4  |
| Diabetes               | 88    | 2.5  | 18  | 4.7  | 27   | 4.0   | <10  | <2.5  | 93    | 2.5  | <10  | <9.1  | 64    | 2.7  | 213   | 2.8  |
| Chronic muscle disease | 46    | 1.3  | <10 | <2.6 | <10  | <1.3  | <10  | <2.5  | 40    | 1.1  | <10  | <9.1  | 25    | 1.1  | 85    | 1.1  |
| Autoimmune disease     | 145   | 4.2  | 26  | 6.7  | 31   | 4.6   | 14   | 6.6   | 181   | 4.9  | 11   | 10.2  | 121   | 5.1  | 384   | 5.1  |
| Psychiatric disorder   | 76    | 2.2  | 14  | 3.6  | 10   | 1.5   | 11   | 5.2   | 85    | 2.3  | <10  | <9.1  | 52    | 2.2  | 176   | 2.4  |
| Other chronic disease  | 523   | 15.1 | 85  | 22.0 | 111  | 16.5  | 42   | 19.8  | 574   | 15.4 | 17   | 15.7  | 343   | 14.5 | 1,172 | 15.7 |
| Vaccination status**   |       |      |     |      |      |       |      |       |       |      |      |       |       |      |       |      |
| Fully vaccinated       | 1,584 | 45.7 | 0   | 0.0  | 611  | 80.8  | 0    | 0.0   | 2,712 | 66.7 | 19   | 17.3  | 2,094 | 76.8 | 5,436 | 64.3 |
| Partially vaccinated   | 98    | 2.8  | 0   | 0.0  | <10  | <1.3  | <10  | <2.5  | 139   | 3.4  | 0    | 0.0   | 104   | 3.8  | 249   | 2.9  |
| Not vaccinated         | 1,783 | 51.5 | 386 | 100  | >135 | >17.9 | >400 | >99.0 | 1,211 | 29.8 | 91   | 82.7  | 526   | 19.3 | 2,758 | 32.6 |
| Virus variant**        |       |      |     |      |      |       |      |       |       |      |      |       |       |      |       |      |
| Omicron                | 2,656 | 76.7 | 0   | 0.0  | 756  | 100   | 28   | 6.9   | 3,738 | 91.9 | >20  | >18.2 | 2,612 | 95.8 | 7,159 | 84.7 |
| Delta                  | 649   | 18.7 | 0   | 0.0  | 0    | 0.0   | 72   | 17.8  | 241   | 5.9  | <10  | <9.1  | 97    | 3.6  | 416   | 4.9  |
| Alpha                  | 160   | 4.6  | 386 | 100  | 0    | 0.0   | 305  | 75.3  | 88    | 2.2  | 79   | 71.8  | 17    | 0.6  | 875   | 10.4 |
| Hospitalization**      |       |      |     |      |      |       |      |       |       |      |      |       |       |      |       |      |
| No                     | 3,340 | 96.4 | 363 | 94   | 756  | 100   | 373  | 92.1  | 3,955 | 97.2 | >100 | >90.9 | 2,675 | 98.1 | 8,223 | 97.3 |
| Yes                    | 125   | 3.6  | 23  | 6.0  | 0    | 0.0   | 32   | 7.9   | 112   | 2.8  | <10  | <9.1  | 51    | 1.9  | 227   | 2.7  |

\* There was no possibility for individuals at wave 20 (n=353) and wave 26 (n=3,213) to be measured 90-150 days after SARS-CoV-2 infection, as there was no measurement wave that matched this time-window

\*\* As some categories contained less than 10 participants, uncertainty was added to another category to prevent traceability of participants

**Supplement table 2.** Categorization of chronic diseases

|    | <b>Answer categories to the question “Do you have a chronic disease?”</b>        | <b>Final list of chronic diseases</b> |
|----|----------------------------------------------------------------------------------|---------------------------------------|
| 1  | Cardiovascular disease                                                           | Cardiovascular disease                |
| 2  | High blood pressure                                                              | Cardiovascular disease                |
| 3  | Heart attack                                                                     | Cardiovascular disease                |
| 4  | Narrowing of the arteries in the legs                                            | Cardiovascular disease                |
| 5  | Stroke or TIA                                                                    | Cardiovascular disease                |
| 6  | Other heart and/or coronary disease                                              | Cardiovascular disease                |
| 7  | Lung disease, such as asthma, COPD or chronic bronchitis                         | Lung disease                          |
| 8  | Liver disease*                                                                   | Other                                 |
| 9  | Kidney disease or reduced kidney function*                                       | Other                                 |
| 10 | Diabetes                                                                         | Diabetes                              |
| 11 | Chronic muscle disease                                                           | Chronic muscle disease                |
| 12 | Auto-immune disease, such as inflammatory bowel disorder or rheumatoid arthritis | Autoimmune disease                    |
| 13 | Cancer*                                                                          | Other                                 |
| 14 | Neurological disease, such as dementia or Parkinson’s disease*                   | Other                                 |
| 15 | Problems with your spleen*                                                       | Other                                 |
| 16 | Psychiatric disorder                                                             | Psychiatric disorder                  |
| 17 | Other                                                                            | Other                                 |

\* Participants with “liver disease (n=11)”, “kidney disease (n=25)”, “neurological disease (n=11)”, cancer (n=39) and “problems with spleen (n=5)” were merged with the “other” disease group as these numbers are too low for the multivariable regression analyses.

**Supplement table 3.** Mean (SD) symptom severity, presence of symptoms at moderate severity, and presence of symptoms with a substantial increase of symptom severity (i.e. 1-point increase) to at least moderate severity 90-150 days after infection in those with COVID-19 and post COVID-19 condition

|                                  | COVID-19 (n=2,823) |                       |      |                                          | Post COVID-19 condition (n=624) |             |                       |      |                                          |      |
|----------------------------------|--------------------|-----------------------|------|------------------------------------------|---------------------------------|-------------|-----------------------|------|------------------------------------------|------|
|                                  | Mean (SD)          | Presences of symptoms |      | Substantial increase of symptom severity |                                 | Mean (SD)   | Presences of symptoms |      | Substantial increase of symptom severity |      |
|                                  |                    | n                     | %    | n                                        | %                               |             | n                     | %    | n                                        | %    |
| Chest pain                       | 1.08 (0.28)        | <10                   | <0.3 | -                                        | -                               | 1.41 (0.71) | 56                    | 8.7  | 51                                       | 7.9  |
| Painful muscles                  | 1.43 (0.58)        | 92                    | 3.3  | -                                        | -                               | 2.48 (1.10) | 301                   | 46.9 | 242                                      | 37.7 |
| Difficulties breathing           | 1.08 (0.28)        | <10                   | <0.3 | -                                        | -                               | 1.50 (0.81) | 71                    | 11.1 | 64                                       | 10.0 |
| Feeling hot and cold alternately | 1.17 (0.40)        | 20                    | 0.7  | -                                        | -                               | 1.88 (1.10) | 160                   | 24.9 | 134                                      | 20.9 |
| Tingling extremities             | 1.16 (0.38)        | 23                    | 0.8  | -                                        | -                               | 1.71 (0.97) | 121                   | 18.8 | 100                                      | 15.6 |
| Feeling a lump in the throat     | 1.10 (0.30)        | <10                   | <0.3 | -                                        | -                               | 1.44 (0.83) | 64                    | 10.0 | 59                                       | 9.2  |
| General tiredness                | 1.18 (0.39)        | 13                    | 0.5  | -                                        | -                               | 2.03 (1.09) | 180                   | 28.0 | 164                                      | 25.5 |
| Heavy arms and legs              | 1.15 (0.37)        | 12                    | 0.4  | -                                        | -                               | 1.96 (1.05) | 168                   | 26.2 | 143                                      | 22.3 |
| Pain when breathing              | 1.02 (0.14)        | 0                     | 0.0  | -                                        | -                               | 1.20 (0.55) | 22                    | 3.4  | 22                                       | 3.4  |
| Ageusia/anosmia                  | 1.07 (0.29)        | <10                   | <0.3 | -                                        | -                               | 1.94 (1.37) | 190                   | 29.6 | 185                                      | 28.8 |

**Supplement table 4.** Fit statistics for the Latent Profile Analysis

| Model | Classes                | AIC      | BIC      | Entropy | Minimal probability | Maximal probability | N min | N max | BLRT-p |
|-------|------------------------|----------|----------|---------|---------------------|---------------------|-------|-------|--------|
| 1     | 1                      | 17321.21 | 17410.50 | 1.00    | 1.00                | 1.00                | 1.00  | 1.00  |        |
| 1     | 2                      | 16801.14 | 16939.54 | 0.98    | 0.99                | 0.99                | 0.29  | 0.71  | 0.01   |
| 1     | 3                      | 16054.94 | 16242.45 | 0.95    | 0.97                | 0.98                | 0.09  | 0.64  | 0.01   |
| 1     | 4                      | 15763.92 | 16000.54 | 0.90    | 0.87                | 0.98                | 0.06  | 0.56  | 0.01   |
| 1     | 5                      | 15611.12 | 15896.85 | 0.92    | 0.89                | 0.99                | 0.03  | 0.51  | 0.01   |
| 1     | 6                      | 14994.67 | 15329.51 | 0.94    | 0.85                | 1.00                | 0.02  | 0.49  | 0.01   |
| 1     | 7                      | 14932.31 | 15316.26 | 0.91    | 0.80                | 1.00                | 0.03  | 0.42  | 0.01   |
| 1     | 8                      | 14904.96 | 15338.03 | 0.91    | 0.77                | 1.00                | 0.02  | 0.41  | 0.01   |
| 1     | 9                      | 14833.92 | 15316.09 | 0.92    | 0.77                | 1.00                | 0.02  | 0.39  | 0.01   |
| 1     | 10                     | 14833.13 | 15364.42 | 0.88    | 0.70                | 1.00                | 0.03  | 0.32  | 0.13   |
| 2     | 1                      | 16146.63 | 16436.83 | 1.00    | 1.00                | 1.00                | 1.00  | 1.00  |        |
| 2     | 2                      | 15677.50 | 16016.81 | 0.98    | 0.99                | 1.00                | 0.29  | 0.71  | 0.01   |
| 2     | 3                      | 15642.34 | 16030.76 | 0.81    | 0.88                | 1.00                | 0.29  | 0.38  | 0.01   |
| 2     | 4                      | 15286.27 | 15723.80 | 0.92    | 0.88                | 0.99                | 0.10  | 0.49  | 0.01   |
| 2     | 5                      | 15035.55 | 15522.19 | 0.93    | 0.88                | 0.99                | 0.09  | 0.44  | 0.01   |
| 2     | 6                      | 14953.75 | 15489.50 | 0.93    | 0.87                | 0.99                | 0.07  | 0.43  | 0.01   |
| 2     | 7                      | 14909.46 | 15494.32 | 0.91    | 0.86                | 1.00                | 0.07  | 0.34  | 0.01   |
| 2     | 8                      | 14866.78 | 15500.76 | 0.91    | 0.84                | 1.00                | 0.01  | 0.34  | 0.01   |
| 2     | 9                      | 14323.88 | 15006.96 | 0.92    | 0.87                | 1.00                | 0.01  | 0.30  | 0.01   |
| 2     | 10                     | 14283.96 | 15016.16 | 0.92    | 0.86                | 1.00                | 0.01  | 0.28  | 0.01   |
| 3     | Could not be estimated |          |          |         |                     |                     |       |       |        |
| 4     | Could not be estimated |          |          |         |                     |                     |       |       |        |

Model 1: variance within class, no variance between classes, no covariance within class, no covariance between classes

Model 2: variance within class, no variance between classes, covariance within class, no covariance between classes

Model 3: variance within class, variance between classes, no covariance within class, no covariance between classes

Model 4: variance within class, variance between classes, covariance within class, covariance between classes

Abbreviations: AIC: Akaike information criterion; BIC: Bayesian information criterion; BLRT: bootstrapped likelihood test

**Supplement table 5.** Mean (SD) symptom severity and presence of symptoms with a substantial increase of symptom severity (i.e. 1-point increase) to at least moderate severity 90-150 days after infection by symptom profile

|                              | <b>No post COVID-19<br/>(n=2,823)</b> |     | <b>Muscle pain<br/>(n=357)</b> |     | <b>Fatigue<br/>(n=92)</b> |     | <b>Cardiorespiratory<br/>(n=36)</b> |     | <b>Ageusia/anosmia<br/>(n=157)</b> |     |      |
|------------------------------|---------------------------------------|-----|--------------------------------|-----|---------------------------|-----|-------------------------------------|-----|------------------------------------|-----|------|
|                              | Mean (SD)                             |     | Mean (SD)                      |     | Mean (SD)                 |     | Mean (SD)                           |     | Mean (SD)                          |     |      |
|                              |                                       |     | Substantial increase           |     | Substantial increase      |     | Substantial increase                |     | Substantial increase               |     |      |
|                              |                                       | n   | %                              | n   | %                         | n   | %                                   | n   | %                                  | n   | %    |
| Chest pain                   | 1.09 (0.28)                           | 15  | 4.2                            | 15  | 4.2                       | <10 | <10.7                               | 25  | 69.4                               | <10 | <6.4 |
| Painful muscles              | 1.43 (0.58)                           | 163 | 45.7                           | 163 | 45.7                      | 41  | 44.6                                | 19  | 52.8                               | 19  | 12.1 |
| Difficulties breathing       | 1.08 (0.28)                           | 25  | 7.0                            | 25  | 7.0                       | 11  | 12.0                                | 24  | 66.7                               | <10 | <6.4 |
| Feeling hot/cold alternately | 1.17 (0.40)                           | 76  | 21.3                           | 76  | 21.3                      | 38  | 41.3                                | 14  | 38.9                               | <10 | <6.4 |
| Tingling extremities         | 1.16 (0.38)                           | 59  | 16.5                           | 59  | 16.5                      | 25  | 27.2                                | 10  | 27.8                               | <10 | <6.4 |
| Feeling a lump in the throat | 1.10 (0.30)                           | 29  | 8.1                            | 29  | 8.1                       | 19  | 20.7                                | <10 | <27.8                              | <10 | <6.4 |
| General tiredness            | 1.18 (0.39)                           | 66  | 18.5                           | 66  | 18.5                      | 74  | 80.4                                | 15  | 41.7                               | <10 | <6.4 |
| Heavy arms and legs          | 1.15 (0.37)                           | 52  | 14.6                           | 52  | 14.6                      | 74  | 80.4                                | 11  | 30.6                               | <10 | <6.4 |
| Pain when breathing          | 1.02 (0.14)                           | <10 | <2.8                           | <10 | <2.8                      | 0   | 0.0                                 | 21  | 58.3                               | 0   | 0.0  |
| Ageusia/anosmia              | 1.08 (0.29)                           | <10 | <2.8                           | <10 | <2.8                      | 18  | 19.6                                | 10  | 27.8                               | 153 | 97.5 |

**Supplement table 6.** Participant characteristics per symptom profile

|                             | <b>Muscle pain<br/>(n=357)</b> |      | <b>Fatigue<br/>(n=92)</b> |       | <b>Cardiorespiratory<br/>(n=36)</b> |       | <b>Ageusia/<br/>Anosmia (n=157)</b> |      |
|-----------------------------|--------------------------------|------|---------------------------|-------|-------------------------------------|-------|-------------------------------------|------|
|                             | N                              | %    | N                         | %     | N                                   | %     | n                                   | %    |
| <b>Age</b>                  |                                |      |                           |       |                                     |       |                                     |      |
| 18-39                       | 37                             | 10.4 | <10                       | <10.9 | <10                                 | <27.8 | 13                                  | 8.3  |
| 40-59                       | 205                            | 57.4 | 54                        | 58.7  | 27                                  | 75.0  | 96                                  | 61.1 |
| ≥60                         | 115                            | 32.2 | 29                        | 31.5  | <10                                 | <27.8 | 48                                  | 30.6 |
| <b>Sex</b>                  |                                |      |                           |       |                                     |       |                                     |      |
| Male                        | 92                             | 25.8 | 19                        | 20.7  | <10                                 | <27.8 | 56                                  | 35.7 |
| Female                      | 265                            | 74.2 | 73                        | 79.3  | 27                                  | 75.0  | 101                                 | 64.3 |
| <b>Educational level</b>    |                                |      |                           |       |                                     |       |                                     |      |
| High                        | 113                            | 31.7 | 30                        | 32.6  | 17                                  | 47.2  | 61                                  | 38.9 |
| Medium                      | 162                            | 45.4 | 40                        | 43.5  | 13                                  | 36.1  | 63                                  | 40.1 |
| Low                         | 74                             | 20.7 | 22                        | 23.9  | <10                                 | <27.8 | 27                                  | 17.2 |
| Unknown                     | <10                            | <2.8 | 0                         | 0.0   | <10                                 | <27.8 | <10                                 | <6.4 |
| <b>Smoking</b>              |                                |      |                           |       |                                     |       |                                     |      |
| No                          | 329                            | 92.2 | 79                        | 85.9  | 32                                  | 88.9  | 141                                 | 89.8 |
| Yes                         | 28                             | 7.8  | 13                        | 14.1  | <10                                 | <27.8 | 16                                  | 10.2 |
| <b>Body Mass index</b>      |                                |      |                           |       |                                     |       |                                     |      |
| Healthy                     | 125                            | 35.0 | 43                        | 46.7  | <10                                 | <27.8 | 56                                  | 35.7 |
| Overweight                  | 158                            | 44.3 | 28                        | 30.4  | 15                                  | 41.7  | 72                                  | 45.9 |
| Obese                       | 74                             | 20.7 | 21                        | 22.8  | 14                                  | 38.9  | 29                                  | 18.5 |
| <b>Chronic diseases</b>     |                                |      |                           |       |                                     |       |                                     |      |
| Cardiovascular disease      | 51                             | 14.3 | 11                        | 12.0  | <10                                 | <27.8 | 17                                  | 10.8 |
| Lung disease                | 52                             | 14.6 | 13                        | 14.1  | 11                                  | 30.6  | 12                                  | 7.6  |
| Diabetes                    | 15                             | 4.2  | <10                       | <10.9 | <10                                 | <27.8 | <10                                 | <6.4 |
| Chronic muscle disease      | <10                            | <2.8 | <10                       | <10.9 | <10                                 | <27.8 | <10                                 | <6.4 |
| Autoimmune disease          | 14                             | 3.9  | 11                        | 12.0  | <10                                 | <27.8 | <10                                 | <6.4 |
| Psychiatric disorder        | 14                             | 3.9  | <10                       | <10.9 | <10                                 | <27.8 | <10                                 | <6.4 |
| Other chronic disease       | 75                             | 21.0 | 29                        | 31.5  | <10                                 | <27.8 | 27                                  | 17.2 |
| <b>Chronic disease</b>      |                                |      |                           |       |                                     |       |                                     |      |
| No chronic disease          | 214                            | 59.9 | 47                        | 51.1  | 16                                  | 44.4  | 112                                 | 71.3 |
| One chronic disease         | 86                             | 24.1 | 24                        | 26.1  | <10                                 | <27.8 | 29                                  | 18.5 |
| Multimorbidity              | 57                             | 16.0 | 21                        | 22.8  | 12                                  | 33.3  | 16                                  | 10.2 |
| <b>Vaccination status</b>   |                                |      |                           |       |                                     |       |                                     |      |
| Fully vaccinated            | 166                            | 46.5 | 35                        | 38.0  | 11                                  | 30.6  | 42                                  | 26.8 |
| Partially vaccinated        | 15                             | 4.2  | 0                         | 0.0   | 0                                   | 0.0   | <10                                 | <6.4 |
| Not vaccinated              | 176                            | 49.3 | 57                        | 62.0  | 25                                  | 69.4  | 112                                 | 71.3 |
| <b>Likely virus variant</b> |                                |      |                           |       |                                     |       |                                     |      |
| Omicron                     | 282                            | 79.0 | 64                        | 69.6  | 24                                  | 66.7  | 106                                 | 67.5 |
| Delta                       | 59                             | 16.5 | 25                        | 27.2  | <10                                 | <27.8 | 49                                  | 31.2 |
| Alpha                       | 16                             | 4.5  | <10                       | <10.9 | <10                                 | <27.8 | <10                                 | <6.4 |
| <b>Hospitalization</b>      |                                |      |                           |       |                                     |       |                                     |      |
| No                          | 331                            | 92.7 | 87                        | 94.6  | 30                                  | 83.3  | 155                                 | 98.7 |
| Yes                         | 26                             | 7.3  | <10                       | <10.9 | 6                                   | 16.7  | <10                                 | <6.4 |
| <b>Season of infection</b>  |                                |      |                           |       |                                     |       |                                     |      |
| Winter                      | 263                            | 73.7 | 61                        | 66.3  | 24                                  | 66.7  | 105                                 | 66.9 |
| Spring                      | 40                             | 11.2 | 15                        | 16.3  | <10                                 | <27.8 | 16                                  | 10.2 |
| Summer                      | <10                            | <2.8 | <10                       | <10.9 | <10                                 | <27.8 | <10                                 | <6.4 |
| Autumn                      | 46                             | 12.9 | 15                        | 16.3  | <10                                 | <27.8 | 34                                  | 21.7 |

**Supplement table 7.** Mean (SD) symptom severity, presence of symptoms at moderate severity, and presence of symptoms with a substantial increase of symptom severity (i.e. 1-point increase) to at least moderate severity 90-150 days after infection in those with COVID-19 and post COVID-19 condition

|                                  | COVID-19 (n=2,441) |                       |      |             | Post COVID-19 condition (n=1,024) |      |                                          |      |
|----------------------------------|--------------------|-----------------------|------|-------------|-----------------------------------|------|------------------------------------------|------|
|                                  | Mean (SD)          | Presences of symptoms |      | Mean (SD)   | Presences of symptoms             |      | Substantial increase of symptom severity |      |
|                                  |                    | n                     | %    |             | n                                 | %    | n                                        | %    |
| Headache                         | 1.36 (0.52)        | 35                    | 1.4  | 1.96 (0.99) | 217                               | 21.2 | 166                                      | 16.2 |
| Dizziness                        | 1.15 (0.35)        | <10                   | <0.4 | 1.50 (0.75) | 86                                | 8.4  | 75                                       | 7.3  |
| Chest pain                       | 1.08 (0.26)        | <10                   | <0.4 | 1.31 (0.61) | 57                                | 5.6  | 51                                       | 5.0  |
| Lower back pain                  | 1.37 (0.55)        | 63                    | 2.6  | 1.98 (1.10) | 272                               | 26.6 | 191                                      | 18.7 |
| Nausea                           | 1.13 (0.34)        | <10                   | <0.4 | 1.47 (0.76) | 88                                | 8.6  | 72                                       | 7.0  |
| Painful muscles                  | 1.41 (0.56)        | 71                    | 2.9  | 2.15 (1.06) | 322                               | 31.4 | 242                                      | 23.6 |
| Difficulties breathing           | 1.07 (0.26)        | <10                   | <0.4 | 1.37 (0.70) | 73                                | 7.1  | 64                                       | 6.3  |
| Feeling hot and cold alternately | 1.15 (0.37)        | 13                    | 0.5  | 1.66 (0.97) | 167                               | 16.3 | 134                                      | 13.1 |
| Tingling extremities             | 1.15 (0.37)        | 20                    | 0.8  | 1.52 (0.84) | 124                               | 12.1 | 100                                      | 9.8  |
| Feeling a lump in the throat     | 1.09 (0.29)        | <10                   | <0.4 | 1.34 (0.71) | 64                                | 6.3  | 59                                       | 5.8  |
| General tiredness                | 1.15 (0.36)        | <10                   | <0.4 | 1.78 (0.97) | 184                               | 18.0 | 164                                      | 16.0 |
| Heavy arms and legs              | 1.13 (0.34)        | <10                   | <0.4 | 1.70 (0.95) | 174                               | 17.0 | 143                                      | 14.0 |
| Pain when breathing              | 1.02 (0.13)        | 0                     | 0.0  | 1.14 (0.46) | 22                                | 2.1  | 22                                       | 2.1  |
| Runny nose                       | 1.33 (0.48)        | 22                    | 0.9  | 1.77 (0.92) | 183                               | 17.9 | 133                                      | 13.0 |
| Sore throat                      | 1.13 (0.33)        | <10                   | <0.4 | 1.46 (0.78) | 98                                | 9.6  | 88                                       | 8.6  |
| Dry cough                        | 1.19 (0.40)        | <10                   | <0.4 | 1.52 (0.80) | 102                               | 10.0 | 91                                       | 8.9  |
| Wet cough                        | 1.15 (0.36)        | 10                    | 0.4  | 1.41 (0.79) | 101                               | 9.9  | 86                                       | 8.4  |
| Fever                            | 1.01 (0.09)        | 0                     | 0.0  | 1.10 (0.41) | 20                                | 2.0  | 18                                       | 1.8  |
| Diarrhoea                        | 1.09 (0.29)        | <10                   | <0.4 | 1.28 (0.63) | 50                                | 4.9  | 43                                       | 4.2  |
| Stomach pain                     | 1.12 (0.32)        | <10                   | <0.4 | 1.40 (0.70) | 77                                | 7.5  | 58                                       | 5.7  |
| Ageusia/anosmia                  | 1.07 (0.29)        | <10                   | <0.4 | 1.62 (1.17) | 191                               | 18.7 | 185                                      | 18.1 |
| Itchy eyes                       | 1.17 (0.37)        | 11                    | 0.5  | 1.59 (0.88) | 142                               | 13.9 | 106                                      | 10.4 |
| Sneezing                         | 1.42 (0.50)        | 20                    | 0.8  | 1.80 (0.81) | 165                               | 16.1 | 111                                      | 10.8 |



**Supplement table 8.** Participant characteristics of the analytic study sample (n=3,465)

| Characteristic         | Total study Sample<br>(n=3,465) |      | COVID-19<br>(n=2,441) |      | Post COVID-19 Condition<br>(n=1,024) |      |
|------------------------|---------------------------------|------|-----------------------|------|--------------------------------------|------|
|                        | n                               | %    | n                     | %    | n                                    | %    |
| Age                    |                                 |      |                       |      |                                      |      |
| 18-39                  | 343                             | 9.9  | 218                   | 8.9  | 125                                  | 12.2 |
| 40-59                  | 1,810                           | 52.2 | 1,234                 | 50.6 | 576                                  | 56.3 |
| ≥60                    | 1,312                           | 37.9 | 989                   | 40.5 | 323                                  | 31.5 |
| Sex                    |                                 |      |                       |      |                                      |      |
| Male                   | 1,238                           | 35.7 | 969                   | 39.7 | 269                                  | 26.3 |
| Female                 | 2,227                           | 64.3 | 1,472                 | 60.3 | 755                                  | 73.7 |
| Educational level      |                                 |      |                       |      |                                      |      |
| High                   | 1,185                           | 34.2 | 820                   | 33.6 | 365                                  | 35.6 |
| Medium                 | 1,380                           | 39.8 | 944                   | 38.7 | 436                                  | 42.6 |
| Low                    | 811                             | 23.4 | 614                   | 25.2 | 197                                  | 19.2 |
| Unknown                | 89                              | 2.6  | 63                    | 2.6  | 26                                   | 2.5  |
| Smoking                |                                 |      |                       |      |                                      |      |
| No                     | 3,132                           | 90.4 | 2,208                 | 90.5 | 924                                  | 90.2 |
| Yes                    | 333                             | 9.6  | 233                   | 9.5  | 100                                  | 9.8  |
| Body Mass index        |                                 |      |                       |      |                                      |      |
| Healthy                | 1,535                           | 44.3 | 1,129                 | 46.3 | 406                                  | 39.6 |
| Overweight             | 1,386                           | 40.0 | 968                   | 39.7 | 418                                  | 40.8 |
| Obese                  | 544                             | 15.7 | 344                   | 14.1 | 200                                  | 19.5 |
| Chronic diseases       |                                 |      |                       |      |                                      |      |
| Cardiovascular disease | 345                             | 10.0 | 221                   | 9.1  | 124                                  | 12.1 |
| Lung disease           | 336                             | 9.7  | 209                   | 8.6  | 127                                  | 12.4 |
| Diabetes               | 88                              | 2.5  | 51                    | 2.1  | 37                                   | 3.6  |
| Chronic muscle disease | 46                              | 1.3  | 20                    | 0.8  | 26                                   | 2.5  |
| Autoimmune disease     | 145                             | 4.2  | 91                    | 3.7  | 54                                   | 5.3  |
| Psychiatric disorder   | 76                              | 2.2  | 45                    | 1.8  | 31                                   | 3.0  |
| Other chronic disease  | 523                             | 15.1 | 321                   | 13.2 | 202                                  | 19.7 |
| Chronic disease        |                                 |      |                       |      |                                      |      |
| No chronic disease     | 2,469                           | 71.3 | 1,811                 | 74.2 | 658                                  | 64.3 |
| One chronic disease    | 601                             | 17.3 | 383                   | 15.7 | 218                                  | 21.3 |
| Multimorbidity         | 395                             | 11.4 | 247                   | 10.1 | 148                                  | 14.5 |
| Vaccination status     |                                 |      |                       |      |                                      |      |
| Fully vaccinated       | 1,584                           | 45.7 | 1,107                 | 45.4 | 477                                  | 46.6 |
| Partially vaccinated   | 98                              | 2.8  | 69                    | 2.8  | 29                                   | 2.8  |
| Not vaccinated         | 1,783                           | 51.5 | 1,265                 | 51.8 | 518                                  | 50.6 |
| Virus variant          |                                 |      |                       |      |                                      |      |
| Omicron                | 2,656                           | 76.7 | 1,848                 | 75.7 | 808                                  | 78.9 |
| Delta                  | 649                             | 18.7 | 469                   | 19.2 | 180                                  | 17.6 |
| Alpha                  | 160                             | 4.6  | 124                   | 5.1  | 36                                   | 3.5  |
| Hospitalization        |                                 |      |                       |      |                                      |      |
| No                     | 3,340                           | 96.4 | 2,360                 | 96.7 | 980                                  | 95.7 |
| Yes                    | 125                             | 3.6  | 81                    | 3.3  | 44                                   | 4.3  |
| Season of infection    |                                 |      |                       |      |                                      |      |
| Winter                 | 2,555                           | 73.7 | 1,798                 | 73.7 | 757                                  | 73.9 |
| Spring                 | 388                             | 11.2 | 271                   | 11.1 | 117                                  | 11.4 |
| Summer                 | 77                              | 2.2  | 55                    | 2.3  | 22                                   | 2.1  |
| Autumn                 | 445                             | 12.8 | 317                   | 13.0 | 128                                  | 12.5 |

**Supplement table 9.** Fit statistics for the Latent Profile Analysis

| Model | Classes                | AIC      | BIC      | Entropy | Minimal probability | Maximal probability | N min | N max | BLRT-p |
|-------|------------------------|----------|----------|---------|---------------------|---------------------|-------|-------|--------|
| 1     | 1                      | 55950.33 | 56177.18 | 1.00    | 1.00                | 1.00                | 1.00  | 1.00  |        |
| 1     | 2                      | 53822.97 | 54168.17 | 0.91    | 0.94                | 0.98                | 0.20  | 0.80  | 0.01   |
| 1     | 3                      | 53355.66 | 53819.22 | 0.94    | 0.93                | 0.98                | 0.14  | 0.71  | 0.01   |
| 1     | 4                      | 52479.45 | 53061.37 | 0.94    | 0.90                | 0.99                | 0.05  | 0.65  | 0.01   |
| 1     | 5                      | 51917.13 | 52617.40 | 0.93    | 0.91                | 0.99                | 0.03  | 0.59  | 0.01   |
| 1     | 6                      | 51408.16 | 52226.78 | 0.93    | 0.90                | 0.99                | 0.03  | 0.54  | 0.01   |
| 1     | 7                      | 51410.30 | 52347.28 | 0.91    | 0.73                | 0.99                | 0.02  | 0.49  | 0.15   |
| 1     | 8                      | 51215.59 | 52270.92 | 0.88    | 0.72                | 0.98                | 0.03  | 0.41  | 0.01   |
| 1     | 9                      | 50832.60 | 52006.29 | 0.89    | 0.76                | 0.99                | 0.02  | 0.38  | 0.01   |
| 1     | 10                     | 50625.29 | 51917.33 | 0.89    | 0.72                | 1.00                | 0.02  | 0.37  | 0.01   |
| 2     | 1                      | 51444.89 | 52919.40 | 1.00    | 1.00                | 1.00                | 1.00  | 1.00  |        |
| 2     | 2                      | 50389.76 | 51982.63 | 1.00    | 1.00                | 1.00                | 0.07  | 0.93  | 0.01   |
| 2     | 3                      | 49548.61 | 51259.83 | 0.99    | 1.00                | 1.00                | 0.06  | 0.76  | 0.01   |
| 2     | 4                      | 49486.17 | 51315.74 | 0.90    | 0.82                | 1.00                | 0.06  | 0.61  | 0.01   |
| 2     | 5                      | 49264.90 | 51212.83 | 0.91    | 0.87                | 1.00                | 0.05  | 0.54  | 0.01   |
| 2     | 6                      | 49285.71 | 51352.00 | 0.85    | 0.70                | 1.00                | 0.06  | 0.47  | 0.41   |
| 2     | 7                      | 49099.29 | 51283.93 | 0.87    | 0.78                | 1.00                | 0.06  | 0.42  | 0.01   |
| 2     | 8                      | 49030.66 | 51333.65 | 0.84    | 0.74                | 1.00                | 0.04  | 0.33  | 0.01   |
| 2     | 9                      | 48841.90 | 51263.25 | 0.87    | 0.75                | 1.00                | 0.04  | 0.36  | 0.01   |
| 2     | 10                     | 48491.42 | 51031.13 | 0.87    | 0.72                | 1.00                | 0.03  | 0.35  | 0.01   |
| 3     | Could not be estimated |          |          |         |                     |                     |       |       |        |
| 4     | Could not be estimated |          |          |         |                     |                     |       |       |        |

Model 1: variance within class, no variance between classes, no covariance within class, no covariance between classes

Model 2: variance within class, no variance between classes, covariance within class, no covariance between classes

Model 3: variance within class, variance between classes, no covariance within class, no covariance between classes

Model 4: variance within class, variance between classes, covariance within class, covariance between classes

Abbreviations: AIC: Akaike information criterion; BIC: Bayesian information criterion; BLRT: bootstrapped likelihood test

**Supplement table 10.** Mean (SD) symptom severity and presence of symptoms with a substantial increase of symptom severity (i.e. 1-point increase) to at least moderate severity 90-150 days after infection by symptom profile

|                              | No post COVID-19<br>(n=2,441) |             | Unspecific symptoms<br>(n=662)           |      | Fatigue<br>(n=151)                       |     | Cardiorespiratory<br>(n=52)              |             |                                          |       | Ageusia/anosmia<br>(n=159)               |     |      |
|------------------------------|-------------------------------|-------------|------------------------------------------|------|------------------------------------------|-----|------------------------------------------|-------------|------------------------------------------|-------|------------------------------------------|-----|------|
|                              | Mean (SD)                     |             | Mean (SD)                                |      | Mean (SD)                                |     | Mean (SD)                                |             | Mean (SD)                                |       | Mean (SD)                                |     |      |
|                              |                               |             | Substantial increase of symptom severity |      | Substantial increase of symptom severity |     | Substantial increase of symptom severity |             | Substantial increase of symptom severity |       | Substantial increase of symptom severity |     |      |
|                              |                               |             | n                                        | %    |                                          | n   | %                                        | n           | %                                        | n     | %                                        | n   | %    |
| Headache                     | 1.36 (0.52)                   | 1.86 (0.89) | 92                                       | 13.9 | 2.68 (1.18)                              | 51  | 33.8                                     | 2.44 (1.04) | 13                                       | 25.0  | 1.54 (0.75)                              | 10  | 6.3  |
| Dizziness                    | 1.15 (0.35)                   | 1.39 (0.66) | 40                                       | 6.0  | 2.07 (0.96)                              | 27  | 17.9                                     | 1.95 (0.79) | <10                                      | <19.2 | 1.28 (0.50)                              | <10 | <6.3 |
| Chest pain                   | 1.08 (0.26)                   | 1.17 (0.42) | 13                                       | 2.0  | 1.49 (0.62)                              | <10 | <6.6                                     | 2.84 (0.89) | 28                                       | 53.8  | 1.19 (0.40)                              | <10 | <6.3 |
| Lower back pain              | 1.37 (0.55)                   | 1.97 (1.06) | 141                                      | 21.3 | 2.12 (1.20)                              | 20  | 13.2                                     | 2.46 (1.37) | 15                                       | 28.8  | 1.73 (0.96)                              | 15  | 9.4  |
| Nausea                       | 1.13 (0.34)                   | 1.34 (0.62) | 32                                       | 4.8  | 2.14 (1.05)                              | 33  | 21.9                                     | 1.77 (0.78) | <10                                      | <19.2 | 1.30 (0.59)                              | <10 | <6.3 |
| Painful muscles              | 1.41 (0.56)                   | 2.00 (1.00) | 148                                      | 22.4 | 2.73 (1.12)                              | 48  | 31.8                                     | 3.13 (0.87) | 24                                       | 46.2  | 1.88 (0.87)                              | 22  | 13.8 |
| Difficulties breathing       | 1.07 (0.26)                   | 1.22 (0.51) | 20                                       | 3.0  | 1.51 (0.62)                              | <10 | <6.6                                     | 3.19 (0.87) | 34                                       | 65.4  | 1.27 (0.50)                              | <10 | <6.3 |
| Feeling hot/cold alternately | 1.15 (0.37)                   | 1.48 (0.80) | 64                                       | 9.7  | 2.49 (1.18)                              | 47  | 31.1                                     | 2.34 (1.27) | 17                                       | 32.7  | 1.38 (0.71)                              | <10 | <6.3 |
| Tingling extremities         | 1.15 (0.37)                   | 1.42 (0.75) | 56                                       | 8.5  | 1.89 (1.00)                              | 22  | 14.6                                     | 2.08 (1.10) | 13                                       | 25.0  | 1.41 (0.79)                              | <10 | <6.3 |
| Feeling a lump in the throat | 1.09 (0.29)                   | 1.21 (0.52) | 19                                       | 2.9  | 1.85 (1.05)                              | 29  | 19.2                                     | 1.72 (1.05) | <10                                      | <19.2 | 1.26 (0.60)                              | <10 | <6.3 |
| General tiredness            | 1.15 (0.36)                   | 1.50 (0.67) | 47                                       | 7.1  | 2.98 (0.99)                              | 82  | 54.3                                     | 2.94 (1.22) | 23                                       | 44.2  | 1.45 (0.73)                              | 12  | 7.5  |
| Heavy arms and legs          | 1.13 (0.34)                   | 1.43 (0.68) | 46                                       | 6.9  | 2.77 (1.11)                              | 68  | 45.0                                     | 2.70 (1.18) | 18                                       | 34.6  | 1.45 (0.71)                              | 11  | 6.9  |
| Pain when breathing          | 1.02 (0.13)                   | 1.05 (0.22) | <10                                      | <1.5 | 1.16 (0.35)                              | 0   | 0.0                                      | 2.58 (0.90) | 21                                       | 40.4  | 1.05 (0.21)                              | 0   | 0.0  |
| Runny nose                   | 1.33 (0.48)                   | 1.70 (0.84) | 77                                       | 11.6 | 2.20 (1.13)                              | 36  | 23.8                                     | 1.91 (0.99) | <10                                      | <19.2 | 1.64 (0.85)                              | 11  | 6.9  |
| Sore throat                  | 1.13 (0.33)                   | 1.36 (0.68) | 44                                       | 6.6  | 1.91 (0.97)                              | 27  | 17.9                                     | 1.88 (0.18) | 10                                       | 19.2  | 1.29 (0.57)                              | <10 | <6.3 |
| Dry cough                    | 1.19 (0.40)                   | 1.48 (0.78) | 56                                       | 8.5  | 1.83 (0.95)                              | 25  | 16.6                                     | 1.84 (1.04) | <10                                      | <19.2 | 1.26 (0.52)                              | <10 | <6.3 |
| Wet cough                    | 1.15 (0.36)                   | 1.35 (0.70) | 48                                       | 7.3  | 1.71 (0.99)                              | 25  | 16.6                                     | 1.86 (1.14) | <10                                      | <19.2 | 1.24 (0.64)                              | <10 | <6.3 |
| Fever                        | 1.01 (0.09)                   | 1.05 (0.28) | <10                                      | <1.5 | 1.33 (0.69)                              | <10 | <6.6                                     | 1.25 (0.68) | <10                                      | <19.2 | 1.04 (0.24)                              | <10 | <6.3 |
| Diarrhoea                    | 1.09 (0.29)                   | 1.19 (0.50) | 20                                       | 3.0  | 1.70 (0.92)                              | 15  | 9.9                                      | 1.59 (0.97) | <10                                      | <19.2 | 1.16 (0.38)                              | <10 | <6.3 |
| Stomach pain                 | 1.12 (0.32)                   | 1.28 (0.57) | 26                                       | 3.9  | 1.97 (1.00)                              | 24  | 15.9                                     | 1.81 (0.92) | <10                                      | <19.2 | 1.20 (0.42)                              | <10 | <6.3 |
| Ageusia/anosmia              | 1.07 (0.29)                   | 1.07 (0.25) | 0                                        | 0.0  | 1.54 (0.93)                              | 20  | 13.2                                     | 1.94 (1.39) | 12                                       | 23.1  | 3.89 (0.83)                              | 153 | 96.2 |
| Itchy eyes                   | 1.17 (0.37)                   | 1.51 (0.82) | 68                                       | 10.3 | 2.01 (1.09)                              | 27  | 17.9                                     | 2.05 (1.00) | <10                                      | <19.2 | 1.36 (0.68)                              | <10 | <6.3 |
| Sneezing                     | 1.42 (0.50)                   | 1.75 (0.78) | 69                                       | 10.4 | 2.18 (0.98)                              | 28  | 18.5                                     | 2.01 (0.80) | <10                                      | <19.2 | 1.57 (0.66)                              | <10 | <6.3 |

**Supplement table 11.** Participant characteristics per symptom profile

|                        | Unspecific symptoms<br>(n=662) |      | Fatigue<br>(n=151) |      | Cardiorespiratory<br>(n=52) |       | Ageusia / anosmia<br>(n=159) |      |
|------------------------|--------------------------------|------|--------------------|------|-----------------------------|-------|------------------------------|------|
|                        | N                              | %    | N                  | %    | N                           | %     | n                            | %    |
| Age                    |                                |      |                    |      |                             |       |                              |      |
| 18-39                  | 89                             | 13.4 | 17                 | 11.3 | <10                         | <19.2 | 15                           | 9.4  |
| 40-59                  | 359                            | 54.2 | 93                 | 61.6 | 32                          | 61.5  | 92                           | 57.9 |
| ≥60                    | 214                            | 32.3 | 41                 | 27.2 | 16                          | 30.8  | 52                           | 32.7 |
| Sex                    |                                |      |                    |      |                             |       |                              |      |
| Male                   | 171                            | 25.8 | 29                 | 19.2 | 14                          | 26.9  | 55                           | 34.6 |
| Female                 | 491                            | 74.2 | 122                | 80.8 | 38                          | 73.1  | 104                          | 65.4 |
| Educational level      |                                |      |                    |      |                             |       |                              |      |
| High                   | 238                            | 36.0 | 42                 | 27.8 | 22                          | 42.3  | 63                           | 39.6 |
| Medium                 | 279                            | 42.1 | 74                 | 49.0 | 21                          | 40.4  | 62                           | 39.0 |
| Low                    | 127                            | 19.2 | 34                 | 22.5 | <10                         | <19.2 | 28                           | 17.6 |
| Unknown                | 18                             | 2.7  | <10                | <6.6 | <10                         | <19.2 | <10                          | <6.3 |
| Smoking                |                                |      |                    |      |                             |       |                              |      |
| No                     | 601                            | 90.8 | 136                | 90.1 | 47                          | 90.4  | 140                          | 88.1 |
| Yes                    | 61                             | 9.2  | 15                 | 9.9  | <10                         | <19.2 | 19                           | 11.9 |
| Body Mass index        |                                |      |                    |      |                             |       |                              |      |
| Healthy                | 274                            | 41.4 | 58                 | 38.4 | 14                          | 26.9  | 60                           | 37.7 |
| Overweight             | 270                            | 40.8 | 57                 | 37.7 | 21                          | 40.4  | 70                           | 44.0 |
| Obese                  | 118                            | 17.8 | 36                 | 23.8 | 17                          | 32.7  | 29                           | 18.2 |
| Chronic diseases       |                                |      |                    |      |                             |       |                              |      |
| Cardiovascular disease | 82                             | 12.4 | 14                 | 9.3  | 11                          | 21.2  | 17                           | 10.7 |
| Lung disease           | 74                             | 11.2 | 25                 | 16.6 | 16                          | 30.8  | 12                           | 7.5  |
| Diabetes               | 22                             | 3.3  | <10                | <6.6 | <10                         | <19.2 | <10                          | <6.3 |
| Chronic muscle disease | <10                            | <1.5 | <10                | <6.6 | <10                         | <19.2 | <10                          | <6.3 |
| Autoimmune disease     | 31                             | 4.7  | 11                 | 7.3  | 10                          | 19.2  | <10                          | <6.3 |
| Psychiatric disorder   | 12                             | 1.8  | 10                 | 6.6  | <10                         | <19.2 | <10                          | <6.3 |
| Other chronic disease  | 118                            | 17.8 | 45                 | 29.8 | 11                          | 21.2  | 28                           | 17.6 |
| Chronic diseases       |                                |      |                    |      |                             |       |                              |      |
| No chronic disease     | 437                            | 66.0 | 85                 | 56.3 | 24                          | 46.2  | 112                          | 70.4 |
| One chronic disease    | 139                            | 21.0 | 37                 | 24.5 | 12                          | 23.1  | 30                           | 18.9 |
| Multimorbidity         | 86                             | 13.0 | 29                 | 19.2 | 16                          | 30.8  | 17                           | 10.7 |
| Vaccination status     |                                |      |                    |      |                             |       |                              |      |
| Fully vaccinated       | 352                            | 53.2 | 70                 | 46.4 | 16                          | 30.8  | 39                           | 24.5 |
| Partially vaccinated   | 21                             | 3.2  | <10                | <6.6 | <10                         | <19.2 | <10                          | <6.3 |
| Not vaccinated         | 289                            | 43.7 | 77                 | 51.0 | 35                          | 67.3  | 117                          | 73.6 |
| Likely virus variant   |                                |      |                    |      |                             |       |                              |      |
| Omicron                | 554                            | 83.7 | 112                | 74.2 | 34                          | 65.4  | 108                          | 67.9 |
| Delta                  | 85                             | 12.8 | 34                 | 22.5 | 12                          | 23.1  | 49                           | 30.8 |
| Alpha                  | 23                             | 3.5  | <10                | <6.6 | <10                         | <19.2 | <10                          | <6.3 |
| Hospitalization        |                                |      |                    |      |                             |       |                              |      |
| No                     | 640                            | 96.7 | 141                | 93.4 | 45                          | 86.5  | 154                          | 96.9 |
| Yes                    | 22                             | 3.3  | 10                 | 6.6  | <10                         | <19.2 | <10                          | <6.3 |
| Season of infection    |                                |      |                    |      |                             |       |                              |      |
| Winter                 | 514                            | 77.6 | 104                | 68.9 | 34                          | 65.4  | 105                          | 66.0 |
| Spring                 | 74                             | 11.2 | 16                 | 10.6 | <10                         | <19.2 | 18                           | 11.3 |
| Summer                 | 13                             | 2.0  | <10                | <6.6 | <10                         | <19.2 | <10                          | <6.3 |
| Autumn                 | 61                             | 9.2  | 26                 | 17.2 | <10                         | <19.2 | 34                           | 21.4 |

**Supplement table 12.** Univariable and multivariable associations between participant characteristics and post COVID-19 condition

|                               | n     | Univariable       | Multivariable     |
|-------------------------------|-------|-------------------|-------------------|
|                               |       | OR (95% CI)       | OR (95% CI)       |
| <b>Age</b>                    |       |                   |                   |
| 18-39                         | 343   | Ref               | Ref               |
| 40-59                         | 1,810 | 0.81 (0.64, 1.04) | 0.75 (0.58, 0.97) |
| ≥60                           | 1,312 | 0.57 (0.44, 0.73) | 0.55 (0.42, 0.72) |
| <b>Sex</b>                    |       |                   |                   |
| Male                          | 1,238 | Ref               | Ref               |
| Female                        | 2,227 | 1.85 (1.57, 2.17) | 1.79 (1.51, 2.12) |
| <b>Educational level</b>      |       |                   |                   |
| High                          | 1,185 | Ref               | Ref               |
| Medium                        | 1,380 | 1.04 (0.88, 1.23) | 0.93 (0.78, 1.11) |
| Low                           | 811   | 0.72 (0.59, 0.88) | 0.68 (0.55, 0.85) |
| Unknown                       | 89    | 0.93 (0.58, 1.49) | 0.74 (0.45, 1.24) |
| <b>Smoking</b>                |       |                   |                   |
| No                            | 3,132 | Ref               | Ref               |
| Yes                           | 333   | 1.03 (0.80, 1.31) | 0.96 (0.74, 1.24) |
| <b>Body Mass index</b>        |       |                   |                   |
| Healthy                       | 1,535 | Ref               | Ref               |
| Overweight                    | 1,386 | 1.20 (1.02, 1.41) | 1.31 (1.10, 1.54) |
| Obese                         | 544   | 1.62 (1.31, 1.99) | 1.49 (1.19, 1.86) |
| <b>Cardiovascular disease</b> |       |                   |                   |
| No                            | 3,120 | Ref               | Ref               |
| Yes                           | 345   | 1.38 (1.10, 1.75) | 1.27 (0.98, 1.65) |
| <b>Lung disease</b>           |       |                   |                   |
| No                            | 3,129 | Ref               | Ref               |
| Yes                           | 336   | 1.51 (1.20, 1.91) | 1.22 (0.95, 1.57) |
| <b>Diabetes</b>               |       |                   |                   |
| No                            | 3,377 | Ref               | Ref               |
| Yes                           | 88    | 1.76 (1.14, 2.70) | 1.63 (1.03, 2.58) |
| <b>Chronic muscle disease</b> |       |                   |                   |
| No                            | 3,419 | Ref               | Ref               |
| Yes                           | 46    | 3.15 (1.75, 5.67) | 2.20 (1.18, 4.10) |
| <b>Autoimmune disease</b>     |       |                   |                   |
| No                            | 3,320 | Ref               | Ref               |
| Yes                           | 145   | 1.44 (1.02, 2.03) | 1.05 (0.72, 1.52) |
| <b>Psychiatric disorder</b>   |       |                   |                   |
| No                            | 3,389 | Ref               | Ref               |
| Yes                           | 76    | 1.66 (1.05, 2.64) | 1.13 (0.69, 1.84) |
| <b>Other chronic disease</b>  |       |                   |                   |
| No                            | 2,942 | Ref               | Ref               |
| Yes                           | 523   | 1.62 (1.34, 1.97) | 1.41 (1.14, 1.74) |
| <b>Vaccination status</b>     |       |                   |                   |
| Fully vaccinated              | 1,584 | Ref               | Ref               |
| Partially vaccinated          | 98    | 0.97 (0.62, 1.52) | 0.89 (0.56, 1.42) |
| Not vaccinated                | 1,783 | 0.95 (0.82, 1.10) | 0.96 (0.80, 1.17) |
| <b>Virus variant</b>          |       |                   |                   |
| Omicron                       | 2,656 | Ref               | Ref               |
| Delta                         | 649   | 0.88 (0.72, 1.06) | 0.84 (0.63, 1.13) |
| Alpha                         | 160   | 0.66 (0.45, 0.97) | 0.41 (0.25, 0.67) |
| <b>Hospitalization</b>        |       |                   |                   |
| No                            | 3,340 | Ref               | Ref               |
| Yes                           | 125   | 1.31 (0.90, 1.90) | 1.67 (1.09, 2.54) |
| <b>Season of infection</b>    |       |                   |                   |
| Winter                        | 2,555 | Ref               | Ref               |
| Spring                        | 388   | 1.02 (0.81, 1.29) | 1.23 (0.90, 1.67) |
| Summer                        | 77    | 0.95 (0.57, 1.57) | 0.89 (0.52, 1.53) |
| Autumn                        | 445   | 0.96 (0.77, 1.20) | 1.05 (0.77, 1.41) |

**Supplement table 13.** Multivariable multinomial logistic regression analysis of determinants for profile status among participants with COVID-19 condition\*

|                               | <b>Unspecific symptoms<br/>(n=644)</b> | <b>Fatigue<br/>(n=150)</b> | <b>Cardiorespiratory<br/>(n=51)</b> | <b>Ageusia/anosmia<br/>(n=153)</b> |
|-------------------------------|----------------------------------------|----------------------------|-------------------------------------|------------------------------------|
|                               | OR (95% CI)                            | OR (95% CI)                | OR (95% CI)                         | OR (95% CI)                        |
| <b>Age</b>                    |                                        |                            |                                     |                                    |
| 18-39                         | Ref                                    | Ref                        | Ref                                 | Ref                                |
| 40-59                         | 0.70 (0.52, 0.94)                      | 0.85 (0.48, 1.51)          | 1.37 (0.40, 4.69)                   | 1.05 (0.57, 1.95)                  |
| ≥60                           | 0.53 (0.39, 0.74)                      | 0.48 (0.25, 0.91)          | 0.89 (0.24, 3.31)                   | 0.92 (0.47, 1.77)                  |
| <b>Sex</b>                    |                                        |                            |                                     |                                    |
| Male                          | Ref                                    | Ref                        | Ref                                 | Ref                                |
| Female                        | 1.83 (1.49, 2.23)                      | 2.39 (1.56, 3.65)          | 1.47 (0.77, 2.82)                   | 1.30 (0.91, 1.85)                  |
| <b>Educational level</b>      |                                        |                            |                                     |                                    |
| High                          | Ref                                    | Ref                        | Ref                                 | Ref                                |
| Medium                        | 0.94 (0.77, 1.16)                      | 1.33 (0.89, 1.99)          | 0.59 (0.31, 1.12)                   | 0.73 (0.50, 1.06)                  |
| Low                           | 0.70 (0.54, 0.90)                      | 1.02 (0.62, 1.67)          | 0.31 (0.13, 0.76)                   | 0.50 (0.31, 0.81)                  |
| <b>Smoking</b>                |                                        |                            |                                     |                                    |
| No                            | Ref                                    | Ref                        | Ref                                 | Ref                                |
| Yes                           | 0.86 (0.63, 1.18)                      | 1.00 (0.57, 1.76)          | 0.84 (0.31, 2.31)                   | 1.34 (0.80, 2.27)                  |
| <b>Body Mass index</b>        |                                        |                            |                                     |                                    |
| Healthy                       | Ref                                    | Ref                        | Ref                                 | Ref                                |
| Overweight                    | 1.23 (1.01, 1.50)                      | 1.21 (0.82, 1.78)          | 1.75 (0.85, 3.59)                   | 1.50 (1.04, 2.18)                  |
| Obese                         | 1.39 (1.07, 1.80)                      | 1.61 (1.01, 2.57)          | 2.92 (1.29, 6.60)                   | 1.72 (1.05, 2.81)                  |
| <b>Cardiovascular disease</b> |                                        |                            |                                     |                                    |
| No                            | Ref                                    | Ref                        | Ref                                 | Ref                                |
| Yes                           | 1.46 (1.09, 1.97)                      | 0.69 (0.37, 1.29)          | 1.36 (0.60, 3.09)                   | 1.03 (0.58, 1.85)                  |
| <b>Lung disease</b>           |                                        |                            |                                     |                                    |
| No                            | Ref                                    | Ref                        | Ref                                 | Ref                                |
| Yes                           | 1.15 (0.85, 1.56)                      | 1.44 (0.88, 2.36)          | 3.11 (1.55, 6.27)                   | 0.82 (0.43, 1.54)                  |
| <b>Diabetes</b>               |                                        |                            |                                     |                                    |
| No                            | Ref                                    | Ref                        | Ref                                 | Ref                                |
| Yes                           | 1.50 (0.88, 2.57)                      | 2.52 (1.09, 5.83)          | 1.17 (0.25, 5.58)                   | 1.46 (0.55, 3.90)                  |
| <b>Chronic muscle disease</b> |                                        |                            |                                     |                                    |
| No                            | Ref                                    | Ref                        | Ref                                 | Ref                                |
| Yes                           | 1.25 (0.55, 2.85)                      | 3.50 (1.40, 8.76)          | 5.40 (1.77, 16.5)                   | 1.73 (0.38, 7.86)                  |
| <b>Autoimmune disease</b>     |                                        |                            |                                     |                                    |
| No                            | Ref                                    | Ref                        | Ref                                 | Ref                                |
| Yes                           | 1.12 (0.72, 1.74)                      | 1.26 (0.62, 2.55)          | 3.93 (1.65, 9.34)                   | 0.29 (0.07, 1.22)                  |
| <b>Psychiatric disorder</b>   |                                        |                            |                                     |                                    |
| No                            | Ref                                    | Ref                        | Ref                                 | Ref                                |
| Yes                           | 0.69 (0.35, 1.37)                      | 2.02 (0.94, 4.35)          | 2.82 (0.90, 8.84)                   | 1.08 (0.37, 3.14)                  |
| <b>Other chronic disease</b>  |                                        |                            |                                     |                                    |
| No                            | Ref                                    | Ref                        | Ref                                 | Ref                                |
| Yes                           | 1.31 (1.02, 1.68)                      | 2.20 (1.47, 3.31)          | 0.85 (0.40, 1.83)                   | 1.60 (1.01, 2.54)                  |
| <b>Vaccination status</b>     |                                        |                            |                                     |                                    |
| Fully vaccinated              | Ref                                    | Ref                        | Ref                                 | Ref                                |
| Not vaccinated                | 0.81 (0.65, 1.01)                      | 0.76 (0.49, 1.19)          | 1.50 (0.71, 3.20)                   | 2.70 (1.76, 4.14)                  |
| <b>Virus variant</b>          |                                        |                            |                                     |                                    |
| Omicron                       | Ref                                    | Ref                        | Ref                                 | Ref                                |
| Delta                         | 0.73 (0.51, 1.06)                      | 1.11 (0.57, 2.14)          | 0.93 (0.33, 2.66)                   | 0.94 (0.54, 1.64)                  |
| Alpha                         | 0.44 (0.25, 0.79)                      | 0.36 (0.11, 1.13)          | 1.66 (0.38, 7.19)                   | 0.13 (0.03, 0.60)                  |
| <b>Hospitalization</b>        |                                        |                            |                                     |                                    |
| No                            | Ref                                    | Ref                        | Ref                                 | Ref                                |
| Yes                           | 1.47 (0.86, 2.50)                      | 2.74 (1.26, 5.97)          | 3.00 (1.08, 8.29)                   | 1.30 (0.49, 3.46)                  |
| <b>Season of infection</b>    |                                        |                            |                                     |                                    |
| Winter                        | Ref                                    | Ref                        | Ref                                 | Ref                                |
| Spring                        | 1.31 (0.91, 1.88)                      | 1.24 (0.61, 2.51)          | 0.73 (0.21, 2.53)                   | 1.11 (0.60, 2.05)                  |
| Summer                        | 0.91 (0.48, 1.75)                      | 0.88 (0.28, 2.77)          | 1.01 (0.20, 5.20)                   | 0.45 (0.10, 1.98)                  |
| Autumn                        | 0.88 (0.60, 1.29)                      | 1.40 (0.75, 2.61)          | 1.05 (0.35, 3.17)                   | 1.30 (0.73, 2.29)                  |

\* Due to a low number of participants in some cells: unknown education excluded; partly vaccinated combined with fully vaccinated

**Supplement table 14.** Multivariable multinomial logistic regression analysis of determinants for profile status with the muscle pain profile (n=349) as the reference group\*

|                           | <b>Fatigue<br/>(n=92)</b> | <b>Cardiorespiratory<br/>(n=35)</b> | <b>Ageusia/anosmia<br/>(n=151)</b> |
|---------------------------|---------------------------|-------------------------------------|------------------------------------|
|                           | OR (95% CI)               | OR (95% CI)                         | OR (95% CI)                        |
| <b>Age</b>                |                           |                                     |                                    |
| 18-39                     | Ref                       | Ref                                 | Ref                                |
| 40-59                     | 0.92 (0.40, 1.13)         | 3.62 (0.46, 28.4)                   | 1.43 (0.66, 3.09)                  |
| ≥60                       | 0.99 (0.40, 2.42)         | 1.78 (0.20, 15.6)                   | 1.43 (0.63, 3.25)                  |
| <b>Sex</b>                |                           |                                     |                                    |
| Male                      | Ref                       | Ref                                 | Ref                                |
| Female                    | 1.43 (0.80, 2.56)         | 1.09 (0.47, 2.49)                   | 0.73 (0.48, 1.13)                  |
| <b>Educational level</b>  |                           |                                     |                                    |
| High                      | Ref                       | Ref                                 | Ref                                |
| Medium                    | 0.98 (0.57, 1.71)         | 0.40 (0.18, 0.90)                   | 0.73 (0.46, 1.14)                  |
| Low                       | 1.08 (0.56, 2.10)         | 0.31 (0.10, 0.92)                   | 0.60 (0.34, 1.08)                  |
| <b>Smoking</b>            |                           |                                     |                                    |
| No                        | Ref                       | Ref                                 | Ref                                |
| Yes                       | 2.32 (1.10, 4.89)         | 1.80 (0.55, 5.93)                   | 1.41 (0.70, 2.83)                  |
| <b>Body Mass index</b>    |                           |                                     |                                    |
| Healthy                   | Ref                       | Ref                                 | Ref                                |
| Overweight                | 0.49 (0.28, 0.86)         | 2.21 (0.80, 6.13)                   | 1.10 (0.69, 1.74)                  |
| Obese                     | 0.72 (0.38, 1.36)         | 3.62 (1.23, 10.6)                   | 1.10 (0.62, 1.98)                  |
| <b>Chronic disease</b>    |                           |                                     |                                    |
| No                        | Ref                       | Ref                                 | Ref                                |
| One                       | 1.36 (0.76, 2.42)         | 1.13 (0.44, 2.86)                   | 0.66 (0.39, 1.09)                  |
| Multimorbidity            | 1.76 (0.93, 3.33)         | 2.51 (1.02, 6.18)                   | 0.57 (0.30, 1.08)                  |
| <b>Vaccination status</b> |                           |                                     |                                    |
| Fully vaccinated          | Ref                       | Ref                                 | Ref                                |
| Not vaccinated            | 1.27 (0.69, 2.32)         | 2.27 (0.91, 5.68)                   | 2.44 (1.49, 4.00)                  |
| <b>Virus variant</b>      |                           |                                     |                                    |
| Omicron                   | Ref                       | Ref                                 | Ref                                |
| Delta                     | 2.17 (0.97, 4.85)         | 0.81 (0.23, 2.92)                   | 1.22 (0.63, 2.36)                  |
| Alpha                     | 0.65 (0.15, 2.76)         | 2.54 (0.38, 17.0)                   | 0.26 (0.05, 1.33)                  |
| <b>Season</b>             |                           |                                     |                                    |
| Winter                    | Ref                       | Ref                                 | Ref                                |
| Spring/summer             | 1.37 (0.63, 2.97)         | 0.50 (0.10, 2.43)                   | 0.78 (0.38, 1.61)                  |
| Autumn                    | 0.80 (0.34, 1.86)         | 1.33 (0.36, 4.87)                   | 1.14 (0.57, 2.26)                  |

\* Due to a low number of participants in some cells: unknown education excluded; partly vaccinated combined with fully vaccinated; spring and summer combined
